# Supplementary material for: A Digital Endocranial Cast of the Early Paleocene (Puercan) ‘Archaic’ Mammal Onychodectes tisonensis (Eutheria: Taeniodonta)
Source: Springer Nature journal article supplement (doi:10.1007/s10914-017-9381-1), 2017-03-07

**A Digital Endocranial Cast of the Early Paleocene (Puercan) ‘Archaic’ Mammal  
*Onychodectes tisonensis* (Eutheria: Taeniodonta)**

James G. Napoli<sup>1,2</sup>, Thomas E. Williamson<sup>3</sup>, Sarah L. Shelley<sup>2</sup>, Stephen L. Brusatte<sup>2,3</sup>

<sup>1</sup>Department of Earth, Environmental, and Planetary Sciences, Brown University, 69 Brown Street, Box 5385, Providence, Rhode Island 02912.

\*Corresponding Author. Email: [james\\_napoli@brown.edu](mailto:james_napoli@brown.edu) Phone: (631) 680-8973

<sup>2</sup>School of GeoSciences, University of Edinburgh, Grant Institute, James Hutton Road, Edinburgh EH9 3FE, Scotland, UK.

<sup>3</sup>New Mexico Museum of Natural History and Science, 1801 Mountain Road, NW, Albuquerque, NM 87104-1375, USA

Figures on next two pages.

**Fig. 7** Composite phylogenetic tree assembled based on Bertrand et al. (2016), Blanga-Kanfi et al. (2009), de Muizon et al. (2015), Dozo and Martinez (2015), Rook and Hunter (2013), O’Leary et al. (2013), Orliac et al. (2012), and Simpson (1933).

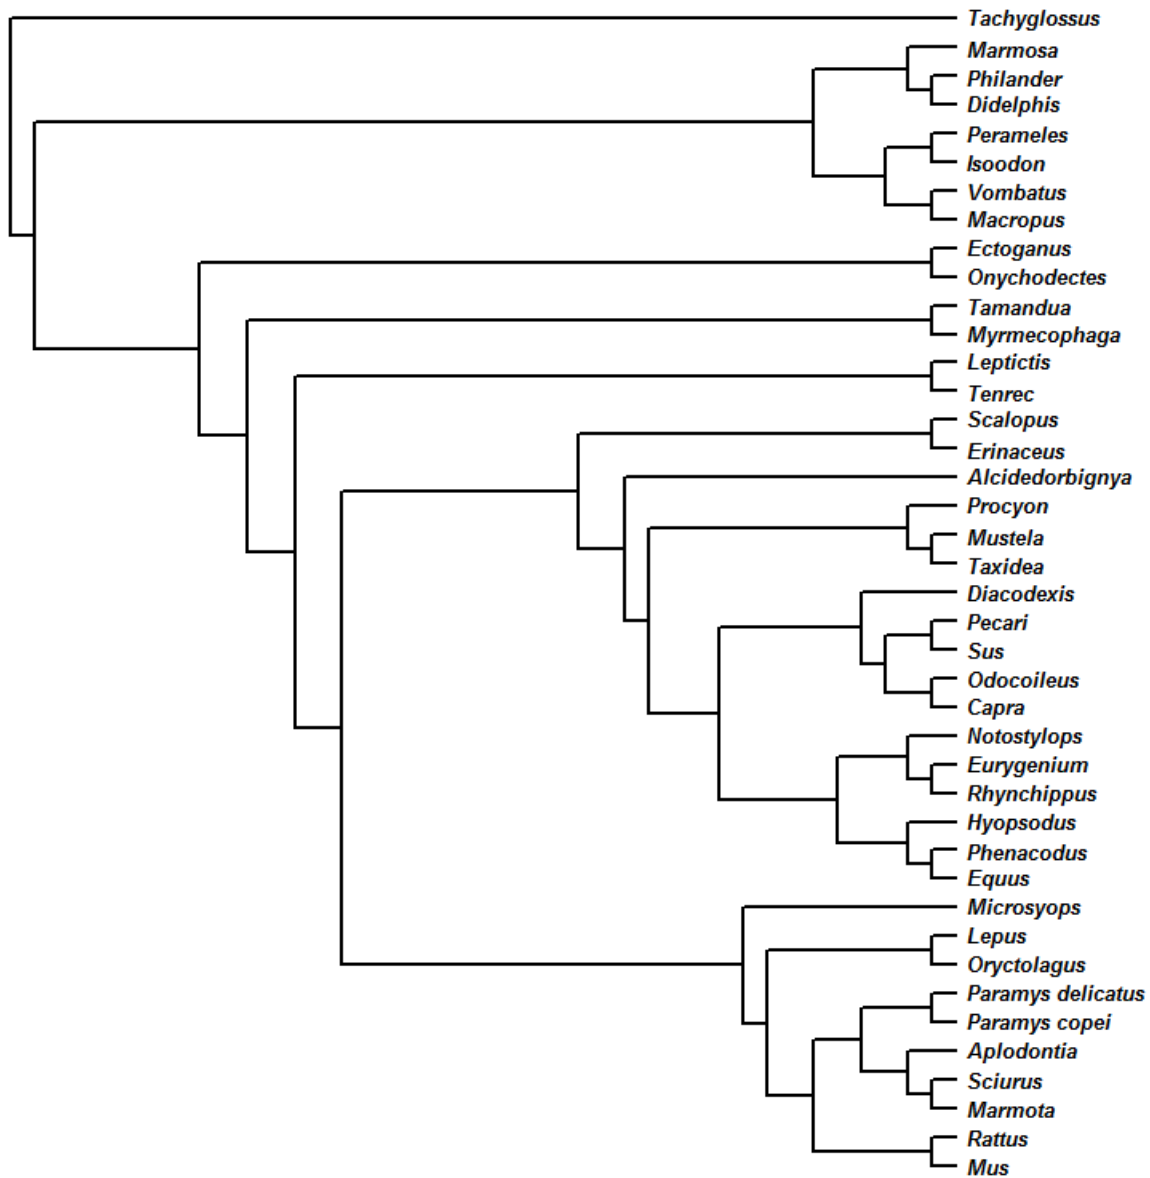

**Fig. 8** Same phylogenetic tree as in Fig. 7, after branch-length estimation and time scaling.

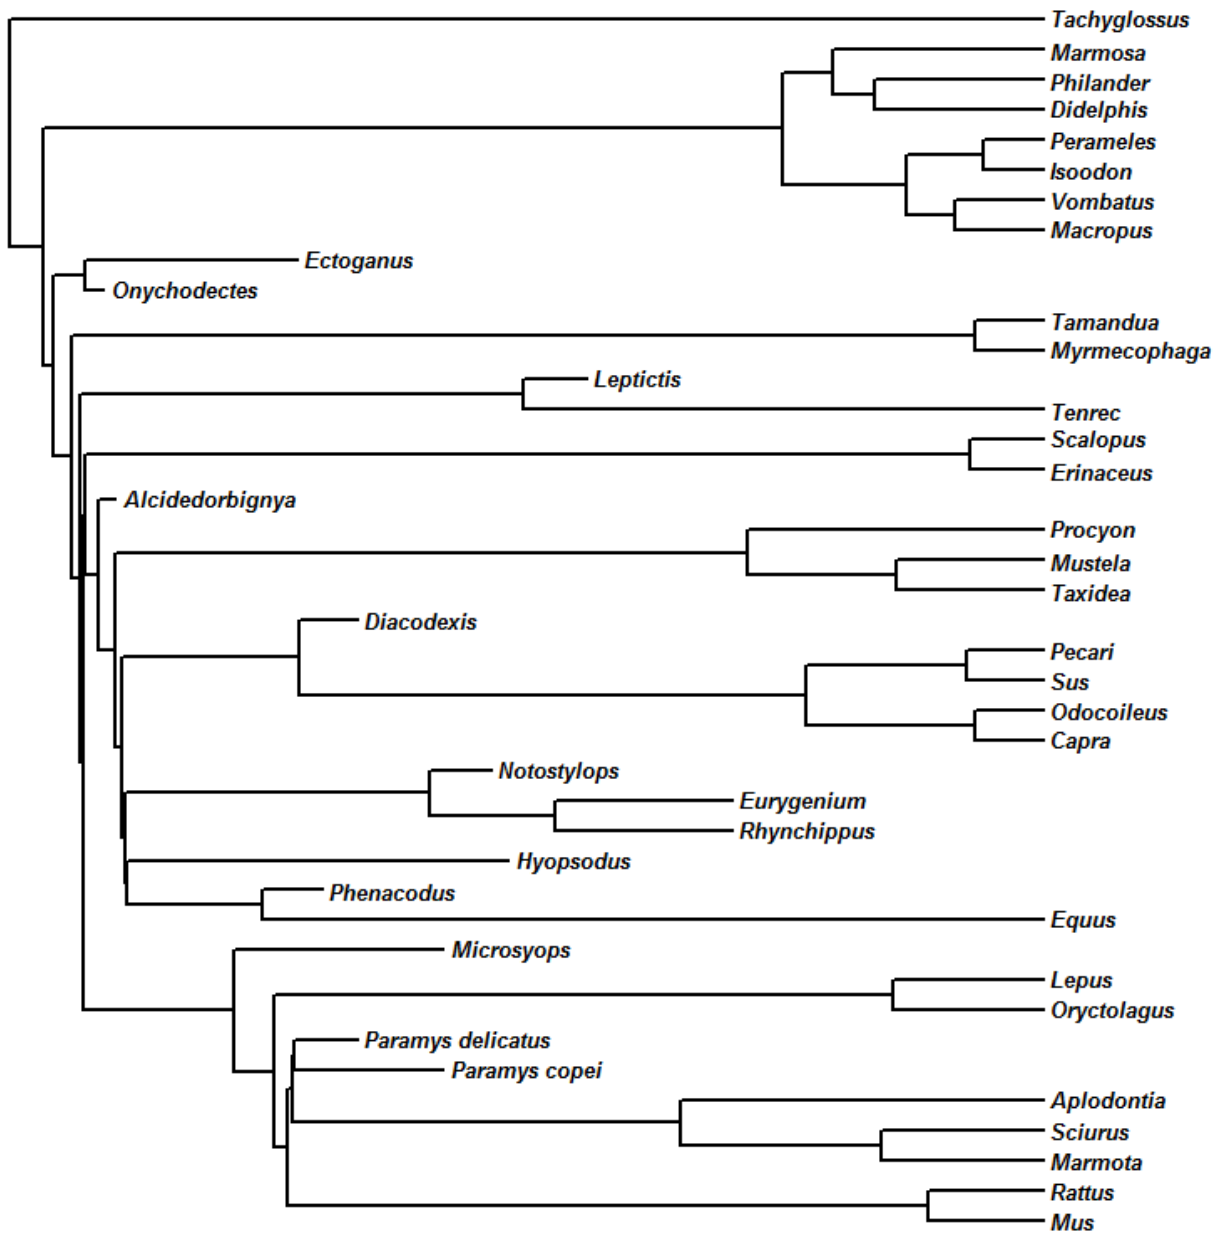

Supplement: 10914_2017_9381_MOESM2_ESM.pdf [file 10914_2017_9381_MOESM2_ESM.pdf]
